# Supplementary material
Source: publisher figshare collection journal article supplement (https://diabetesjournals.figshare.com/articles/dataset/_/20382915)
Supplement: Supplementary file 1 [file 1]

## Supplementary Material 2

Supplement to:

“Effects of Patient-Driven Lifestyle Modification Using Intermittently Scanned Continuous Glucose Monitoring in Patients with Type 2 Diabetes: Results from the Randomized Open-label PDF Study”

| <b>Supplementary Table</b>                                                                                | <b>Page</b> |
|-----------------------------------------------------------------------------------------------------------|-------------|
| <i>Table S1. Baseline characteristics of the study participants</i>                                       | 2           |
| <i>Table S2. Glucose lowering medications in study participants</i>                                       | 3           |
| <i>Table S3. Study outcomes according to treatment groups with additional adjustment for baseline BMI</i> | 4           |
| <i>Table S4. Cumulative distribution of HbA1c values</i>                                                  | 5           |
| <i>Table S5. Study outcomes in the total cohort</i>                                                       | 6           |
| <i>Table S6. CGM outcomes in intention-to-treat analysis</i>                                              | 7           |
| <i>Table S7. Basal insulin dosage at V1 and V2</i>                                                        | 8           |
| <i>Table S8. Study outcomes according to treatment groups in per protocol analysis</i>                    | 9           |
| <i>Table S9. CGM outcomes in per protocol analysis</i>                                                    | 10          |
| <i>Table S10. Adverse glycemic events detected in the intervention group</i>                              | 11          |

**Supplementary Table 1. Baseline characteristics of the study participants**

|                                                | <b>Total</b>   | <b>Intervention</b> | <b>Control</b> | <b>P value</b> |
|------------------------------------------------|----------------|---------------------|----------------|----------------|
|                                                | <b>N = 120</b> | <b>N = 58</b>       | <b>N = 62</b>  |                |
| Age (years)                                    | 58.0 ± 11.9    | 58.6 ± 12.0         | 57.5 ± 11.8    | 0.608          |
| Sex (Female)                                   | 48 (40.0)      | 21 (36.2)           | 27 (43.5)      | 0.412          |
| Height (cm)                                    | 165.1 ± 8.5    | 166.2 ± 8.2         | 164.2 ± 8.6    | 0.193          |
| Weight (kg)                                    | 71.7 ± 12.1    | 70.5 ± 11.7         | 72.7 ± 12.5    | 0.331          |
| BMI (kg/m <sup>2</sup> )                       | 26.2 ± 3.5     | 25.5 ± 3.4          | 26.9 ± 3.5     | 0.028          |
| DM duration (years)                            | 13.3 ± 7.8     | 13.3 ± 8.2          | 13.4 ± 7.6     | 0.911          |
| Family history of DM                           | 61 (50.8)      | 25 (43.1)           | 36 (58.1)      | 0.101          |
| DM medication                                  |                |                     |                |                |
| Insulin                                        | 33 (27.5)      | 19 (32.8)           | 14 (22.6)      | 0.212          |
| Number of non-insulin antidiabetic medications |                |                     |                | 0.870          |
| 0                                              | 1 (0.8)        | 1 (1.7)             | 0 (0.0)        |                |
| 1                                              | 16 (13.3)      | 8 (13.8)            | 8 (12.9)       |                |
| 2                                              | 57 (47.5)      | 28 (48.3)           | 29 (46.8)      |                |
| 3                                              | 44 (36.7)      | 20 (34.5)           | 24 (38.7)      |                |
| 4                                              | 2 (1.7)        | 1 (1.7)             | 1 (1.6)        |                |
| Dyslipidemia                                   | 100 (83.3)     | 51 (87.9)           | 50 (80.6)      | 0.275          |
| Hypertension                                   | 65 (54.2)      | 30 (51.7)           | 36 (58.1)      | 0.485          |
| HbA1c (%)                                      | 7.9 ± 0.7      | 7.9 ± 0.6           | 7.9 ± 0.7      | 0.808          |
| AST (IU/L)                                     | 26 ± 12        | 26 ± 11             | 26 ± 12        | 0.688          |
| ALT (IU/L)                                     | 31 ± 19        | 31 ± 20             | 32 ± 19        | 0.823          |
| BUN (mg/dL)                                    | 16.2 ± 4.9     | 16.5 ± 5.2          | 16.0 ± 4.6     | 0.575          |
| Cr (mg/dL)                                     | 0.83 ± 0.21    | 0.84 ± 0.23         | 0.82 ± 0.20    | 0.665          |
| eGFR (mL/min/1.73 m <sup>2</sup> )             | 91.5 ± 20.7    | 91.9 ± 20.9         | 91.0 ± 20.7    | 0.811          |
| Cigarette                                      |                |                     |                | 0.699          |
| Never smoker                                   | 66 (55.0)      | 30 (51.7)           | 36 (58.1)      |                |
| Ex-smoker                                      | 37 (30.8)      | 20 (34.5)           | 17 (27.4)      |                |
| Current smoker                                 | 17 (14.2)      | 8 (13.8)            | 9 (14.5)       |                |
| Alcohol                                        | 35 (29.2)      | 18 (31.0)           | 17 (27.4)      | 0.663          |

Data are shown as mean ± standard deviation, or number (percentage). Alcohol (%), number (%) of participants who drinks alcohol three or more times a week; DM, diabetes mellitus; AST, aspartate aminotransferase; ALT, alanine aminotransferase; BUN, blood urea nitrogen; eGFR, estimated glomerular filtration rate

**Supplementary Table 2. Glucose lowering medications in study participants**

|                        | <b>Total</b>   | <b>CGM</b>    | <b>BGM</b>    | <b><i>P</i> value</b> |
|------------------------|----------------|---------------|---------------|-----------------------|
|                        | <b>N = 120</b> | <b>N = 58</b> | <b>N = 62</b> |                       |
| Insulin                | 33 (27.5)      | 19 (32.8)     | 14 (22.6)     | 0.212                 |
| Metformin              | 105 (87.5)     | 52 (89.7)     | 53 (85.5)     | 0.490                 |
| Sulfonylurea           | 54 (45.0)      | 23 (39.7)     | 31 (50.0)     | 0.255                 |
| Thiazolidinedione      | 15 (12.5)      | 7 (12.1)      | 8 (12.9)      | 0.890                 |
| DPP4 inhibitor         | 47 (39.2)      | 22 (37.9)     | 25 (40.3)     | 0.789                 |
| SGLT2 inhibitor        | 38 (31.9)      | 19 (32.8)     | 19 (30.6)     | 0.804                 |
| GLP-1 receptor agonist | 11 (9.2)       | 5 (8.6)       | 6 (9.7)       | 0.841                 |

Data are shown as number (percentage). CGM, continuous glucose monitoring; BGM, blood glucose monitoring; DPP4, dipeptidyl peptidase-4; SGLT2, sodium-glucose cotransporter 2; GLP-1, glucagon-like peptide-1

**Supplementary Table 3. Study outcomes according to treatment groups with additional adjustment for baseline BMI**

|                           | V1           |             | <i>P</i> value | V2           |             | <i>P</i> value | Risk-adjusted difference<br>(95% CI) | <i>P</i> * value |
|---------------------------|--------------|-------------|----------------|--------------|-------------|----------------|--------------------------------------|------------------|
|                           | Intervention | Control     |                | Intervention | Control     |                |                                      |                  |
|                           | N = 58       | N = 62      |                | N = 58       | N = 62      |                |                                      |                  |
| Primary outcome           |              |             |                |              |             |                |                                      |                  |
| HbA1c (%)                 | 7.9 ± 0.6    | 7.9 ± 0.7   | 0.808          | 7.3 ± 0.6    | 7.8 ± 0.9   | <0.001         | −0.50 (−0.74 - −0.25)                | <0.001           |
| Secondary outcome         |              |             |                |              |             |                |                                      |                  |
| Fasting glucose (mg/dL)   | 142 ± 27     | 147 ± 36    | 0.420          | 136 ± 35     | 154 ± 43    | 0.013          | −15.4 (−29.1 - 1.6)                  | 0.029            |
| Body weight (kg)          | 70.5 ± 11.7  | 72.7 ± 12.5 | 0.331          | 69.1 ± 11.3  | 72.8 ± 12.8 | 0.105          | −1.6 (−2.8 - −0.3)                   | 0.014            |
| Waist circumference (cm)  | 87.7 ± 8.1   | 91.8 ± 10.2 | 0.018          | 87.4 ± 8.8   | 92.1 ± 10.6 | 0.010          | −0.6 (−1.7 - 0.5)                    | 0.284            |
| SBP (mmHg)                | 133 ± 16     | 126 ± 16    | 0.022          | 134 ± 14     | 124 ± 21    | 0.003          | 7.3 (0.6 - 14.0)                     | 0.032            |
| DBP (mmHg)                | 79 ± 10      | 77 ± 10     | 0.153          | 78 ± 9       | 79 ± 9      | 0.530          | −1.8 (−4.6 - 1.1)                    | 0.219            |
| Total cholesterol (mg/dL) | 138 ± 29     | 140 ± 25    | 0.707          | 136 ± 34     | 140 ± 28    | 0.565          | 0.1 (−7.5 - 7.8)                     | 0.972            |
| Triglyceride (mg/dL)      | 131 ± 68     | 153 ± 73    | 0.094          | 149 ± 197    | 141 ± 72    | 0.761          | 32.9 (−14.6 - 80.3)                  | 0.173            |
| HDL-C (mg/dL)             | 48 ± 13      | 48 ± 17     | 0.965          | 47 ± 12      | 48 ± 15     | 0.627          | −1.5 (−4.8 - 1.7)                    | 0.352            |
| LDL-C (mg/dL)             | 74 ± 22      | 75 ± 20     | 0.852          | 70 ± 25      | 74 ± 25     | 0.487          | −1.3 (−7.3 - 4.7)                    | 0.676            |
| SDSCA-K total score       | 26.6 ± 13.6  | 25.1 ± 12.8 | 0.533          | 44.4 ± 9.2   | 39.2 ± 10.1 | 0.005          | 4.8 (1.6 - 8.1)                      | 0.004            |

Data are shown as mean ± standard deviation. SBP, systolic blood pressure; DBP, diastolic blood pressure; HDL-C, high density lipoprotein-cholesterol; LDL-C, low density lipoprotein-cholesterol; SDSCA-K, the Korean version of revised summary of diabetes self-care activities; *P*\* value is the comparison of the V2 Intervention vs V2 Control using ANCOVA with adjustment for respective baseline values, hospital of recruitment, and baseline body mass index

**Supplementary Table 4. Cumulative distribution of HbA1c values**

| <b>HbA1c (%)</b> | <b>V1</b>           |                |                       | <b>V2</b>           |                |                       |
|------------------|---------------------|----------------|-----------------------|---------------------|----------------|-----------------------|
|                  | <b>Intervention</b> | <b>Control</b> | <b><i>P</i> value</b> | <b>Intervention</b> | <b>Control</b> | <b><i>P</i> value</b> |
| <b>&lt;6.5</b>   | 0 (0.0)             | 0 (0.0)        | -                     | 3 (5.2)             | 2 (3.2)        | 0.594                 |
| <b>&lt;7.0</b>   | 0 (0.0)             | 0 (0.0)        | -                     | 14 (24.1)           | 5 (8.1)        | 0.016                 |
| <b>&lt;7.5</b>   | 14 (24.1)           | 20 (32.3)      | 0.324                 | 37 (63.8)           | 21 (33.9)      | 0.001                 |
| <b>&lt;8.0</b>   | 36 (62.1)           | 37 (59.7)      | 0.789                 | 50 (86.2)           | 42 (67.7)      | 0.017                 |
| <b>&lt;8.5</b>   | 47 (81.0)           | 48 (77.4)      | 0.626                 | 55 (94.8)           | 51 (82.3)      | 0.032                 |
| <b>&lt;9.0</b>   | 53 (91.4)           | 54 (87.1)      | 0.451                 | 57 (98.3)           | 56 (90.3)      | 0.063                 |
| <b>&lt;9.5</b>   | 56 (96.6)           | 57 (91.9)      | 0.281                 | 58 (100.0)          | 59 (95.2)      | 0.090                 |
| <b>&lt;10.0</b>  | 58 (100.0)          | 62 (100.0)     | -                     | 58 (100.0)          | 61 (98.4)      | 0.331                 |

Data are shown as number (percentage).

**Supplementary Table 5. Study outcomes in total participants**

|                                                                                                         | V1<br>N = 120 | V2<br>N = 118 | P value |
|---------------------------------------------------------------------------------------------------------|---------------|---------------|---------|
| <b>Primary outcome</b>                                                                                  |               |               |         |
| HbA1c                                                                                                   | 7.9 ± 0.7     | 7.6 ± 0.8     | <0.001  |
| <b>Secondary outcome</b>                                                                                |               |               |         |
| Fasting glucose (mg/dL)                                                                                 | 145 ± 32      | 146 ± 40      | 0.799   |
| Body weight (kg)                                                                                        | 71.7 ± 12.1   | 71.0 ± 12.2   | 0.039   |
| Waist circumference (cm)                                                                                | 89.8 ± 9.4    | 89.8 ± 10.0   | 0.939   |
| SBP (mmHg)                                                                                              | 129 ± 17      | 129 ± 19      | 0.743   |
| DBP (mmHg)                                                                                              | 78 ± 10       | 79 ± 9        | 0.373   |
| Total cholesterol (mg/dL)                                                                               | 139 ± 27      | 138 ± 31      | 0.793   |
| Triglyceride (mg/dL)                                                                                    | 142 ± 71      | 145 ± 146     | 0.812   |
| HDL-C (mg/dL)                                                                                           | 48 ± 15       | 47 ± 13       | 0.421   |
| LDL-C (mg/dL)                                                                                           | 74 ± 21       | 72 ± 25       | 0.126   |
| <b>SDSCA-K</b>                                                                                          |               |               |         |
| Q1. How many of the last seven days have you followed a healthful eating plan?                          | 3.4 ± 1.9     | 4.2 ± 1.6     | <0.001  |
| Q2. On average, over the past month, how many days per week have you followed your eating plan?         | 2.6 ± 1.7     | 3.8 ± 1.7     | <0.001  |
| Q3. On how many of the last seven days did you eat two or more servings of fruits and vegetables?       | 4.0 ± 1.8     | 4.9 ± 1.6     | <0.001  |
| Q4. On how many of the last seven days did you participate in at least 30 minutes of physical activity? | 3.4 ± 2.4     | 4.2 ± 2.2     | <0.001  |
| Q5. On how many of the last seven days did you participate in a specific exercise session?*             | 1.5 ± 2.0     | 1.7 ± 2.1     | 0.284   |
| Q6. On how many of the last seven days did you test your blood sugar?                                   | 2.7 ± 2.7     | 6.4 ± 1.3     | <0.001  |
| Q7. On how many of the last seven days did you test your blood sugar as recommended by your doctor?     | 2.4 ± 2.6     | 6.4 ± 1.2     | <0.001  |
| Q8. On how many of the last seven days did you check your feet?                                         | 4.0 ± 3.0     | 5.6 ± 2.3     | <0.001  |
| Q9. On how many of the last seven days did you inspect the inside of your shoes?                        | 1.9 ± 2.6     | 4.5 ± 2.9     | <0.001  |
| <b>Total score</b>                                                                                      | 25.6 ± 13.1   | 41.7 ± 10.0   | <0.001  |

\* Examples of specific exercise sessions include swimming, walking, and biking, other than what you do around the house or as part of your work.

**Supplementary Table 6. CGM outcomes in intention-to-treat analysis**

|                                        | CGM during weeks 1-2 | CGM during weeks 11-12 | <i>P</i> value |
|----------------------------------------|----------------------|------------------------|----------------|
|                                        | N = 58               | N = 56                 |                |
| <b>% Time in range of 70–180 mg/dL</b> | 70.4 ± 14.6          | 71.4 ± 15.4            | 0.562          |
| <b>CV (%)</b>                          | 33.8 ± 7.2           | 32.4 ± 6.3             | 0.032          |
| CV < 36%                               | 38 (65.5)            | 41 (73.2)              |                |
| <b>Mean glucose (mg/dL)</b>            | 151 ± 25             | 151 ± 27               | 0.854          |
| <b>Time above range</b>                |                      |                        |                |
| % Time > 180 mg/dL                     | 19.5 ± 8.5           | 20.1 ± 9.9             | 0.549          |
| % Time > 250 mg/dL                     | 6.8 ± 8.0            | 6.1 ± 8.3              | 0.363          |
| <b>Time below range</b>                |                      |                        |                |
| % Time < 70 mg/dL                      | 2.88 ± 4.92          | 2.07 ± 3.93            | 0.251          |
| % Time < 54 mg/dL                      | 0.43 ± 1.2           | 0.32 ± 0.9             | 0.589          |

CGM, continuous glucose monitoring

**Supplementary Table 7. Basal insulin dosage at V1 and V2**

| ID     | Type     | Insulin dose (Unit/day) |    | ID             | Type     | Insulin dose (Unit/day) |             |
|--------|----------|-------------------------|----|----------------|----------|-------------------------|-------------|
|        |          | V1                      | V2 |                |          | V1                      | V2          |
| R01001 | Glargine | 54                      | 54 | R02016         | Glargine | 70                      | 44          |
| R01003 | Degludec | 16                      | 16 | R02020         | Degludec | 80                      | 80          |
| R01006 | Glargine | 44                      | 44 | R02022         | Glargine | 60                      | 60          |
| R01007 | Glargine | 30                      | 28 | R02033         | Glargine | 46                      | 46          |
| R01012 | Glargine | 36                      | 30 | R02035         | Degludec | 80                      | 80          |
| R01019 | Glargine | 33                      | 33 | R03005         | Glargine | 40                      | 40          |
| R01020 | Glargine | 54                      | 54 | R03009         | Degludec | 40                      | 40          |
| R01022 | Glargine | 32                      | 30 | R03011         | Degludec | 55                      | 60          |
| R01026 | Isophane | 36                      | 30 | R03012         | Glargine | 26                      | 26          |
| R01027 | Degludec | 20                      | 20 | R03015         | Degludec | 20                      | 12          |
| R01044 | Degludec | 32                      | 32 | R03016         | Glargine | 38                      | 38          |
| R01039 | Glargine | 38                      | 25 | R03029         | Degludec | 28                      | 30          |
| R02003 | Detemir  | 30                      | 30 | R03030         | Glargine | 50                      | 50          |
| R02009 | Degludec | 70                      | 70 | R03031         | Glargine | 42                      | 42          |
| R02010 | Degludec | 50                      | 50 | R03035         | Glargine | 38                      | 38          |
| R02011 | Glargine | 44                      | 46 | R03040         | Degludec | 62                      | 62          |
| R02013 | Glargine | 28                      | 28 | <b>Average</b> |          | 41.8 ± 15.6             | 40.1 ± 15.9 |



**Supplementary Table 8. Study outcomes according to treatment groups in per protocol analysis**

|                           | V1           |             | <i>P</i> value | V2           |             | <i>P</i> value | Risk-adjusted difference<br>(95% CI) | <i>P</i> * value |
|---------------------------|--------------|-------------|----------------|--------------|-------------|----------------|--------------------------------------|------------------|
|                           | Intervention | Control     |                | Intervention | Control     |                |                                      |                  |
|                           | N = 46       | N = 62      |                | N = 46       | N = 62      |                |                                      |                  |
| <b>Primary outcome</b>    |              |             |                |              |             |                |                                      |                  |
| HbA1c (%)                 | 7.9 ± 0.6    | 7.9 ± 0.7   | 0.865          | 7.3 ± 0.5    | 7.8 ± 0.9   | <0.001         | −0.50 (−0.74 - −0.25)                | <0.001           |
| <b>Secondary outcome</b>  |              |             |                |              |             |                |                                      |                  |
| Fasting glucose (mg/dL)   | 140 ± 28     | 147 ± 36    | 0.300          | 136 ± 36     | 154 ± 43    | 0.019          | −16.3 (−31.1 - −1.5)                 | 0.031            |
| Body weight (kg)          | 70.2 ± 12.3  | 72.7 ± 12.5 | 0.299          | 68.8 ± 12.0  | 72.8 ± 12.8 | 0.106          | −1.5 (−2.8 - −0.2)                   | 0.026            |
| Waist circumference (cm)  | 87.4 ± 8.6   | 91.8 ± 10.2 | 0.022          | 87.2 ± 8.9   | 92.1 ± 10.6 | 0.013          | −0.6 (−1.7 - 0.6)                    | 0.326            |
| SBP (mmHg)                | 133 ± 16     | 126 ± 16    | 0.042          | 135 ± 16     | 124 ± 21    | 0.004          | 8.8 (1.7 - 15.9)                     | 0.016            |
| DBP (mmHg)                | 79 ± 9       | 77 ± 10     | 0.223          | 79 ± 9       | 79 ± 9      | 0.764          | −1.7 (−4.7 - 1.2)                    | 0.253            |
| Total cholesterol (mg/dL) | 136 ± 29     | 140 ± 25    | 0.463          | 135 ± 33     | 140 ± 28    | 0.382          | −1.9 (−9.9 - 6.2)                    | 0.650            |
| Triglyceride (mg/dL)      | 125 ± 64     | 153 ± 73    | 0.041          | 150 ± 218    | 141 ± 72    | 0.762          | 42.9 (−8.9 - 94.7)                   | 0.104            |
| HDL-C (mg/dL)             | 48 ± 12      | 48 ± 17     | 0.968          | 46 ± 11      | 48 ± 15     | 0.529          | −1.3 (−4.7 - 2.2)                    | 0.463            |
| LDL-C (mg/dL)             | 72 ± 20      | 75 ± 20     | 0.534          | 68 ± 22      | 74 ± 25     | 0.269          | −3.2 (−9.5 - 3.1)                    | 0.315            |
| SDSCA-K total score       | 28.7 ± 13.7  | 25.1 ± 12.8 | 0.172          | 45.2 ± 8.3   | 39.2 ± 10.1 | 0.002          | 5.2 (1.8 - 8.6)                      | 0.003            |

Data are shown as mean ± standard deviation. SBP, systolic blood pressure; DBP, diastolic blood pressure; HDL-C, high density lipoprotein-cholesterol; LDL-C, low density lipoprotein-cholesterol; SDSCA-K, the Korean version of revised summary of diabetes self-care activities; *P*\* value is the comparison of the V2 Intervention vs V2 Control using ANCOVA with adjustment for respective baseline values and hospital of recruitment

**Supplementary Table 9. CGM outcomes in per protocol analysis**

|                                          | CGM during weeks 1-2 | CGM during weeks 11-12 | <i>P</i> value |
|------------------------------------------|----------------------|------------------------|----------------|
|                                          | N = 46               | N = 45                 |                |
| <b>% Time in range of 70 – 180 mg/dL</b> | 71.1 ± 14.7          | 72.9 ± 14.1            | 0.264          |
| <b>CV (%)</b>                            | 33.4 ± 7.4           | 32.0 ± 6.4             | 0.024          |
| CV < 36%                                 | 30 (65.2)            | 34 (75.6)              |                |
| <b>Mean glucose (mg/dL)</b>              | 151 ± 25             | 151 ± 27               | 0.699          |
| <b>Time above range</b>                  |                      |                        |                |
| % Time > 180 mg/dL                       | 19.2 ± 8.9           | 19.6 ± 10.2            | 0.795          |
| % Time > 250 mg/dL                       | 6.4 ± 7.1            | 5.0 ± 5.1              | 0.098          |
| <b>Time below range</b>                  |                      |                        |                |
| % Time < 70 mg/dL                        | 2.91 ± 4.98          | 2.18 ± 4.27            | 0.221          |
| % Time < 54 mg/dL                        | 0.46 ± 1.3           | 0.36 ± 1.0             | 0.657          |

CGM, continuous glucose monitoring

**Supplementary Table 10. Adverse glycemic events detected in the intervention group**

|                                   | Intervention group (N = 58) |                       | Control group (N = 62) |            |
|-----------------------------------|-----------------------------|-----------------------|------------------------|------------|
|                                   | Participants                | Duration in Hours (%) | Participants           | BGM (%)    |
| <b>Glucose monitoring per day</b> | 8.6 ± 5.3                   |                       | 1.8 ± 0.9              |            |
| <b>Hyperglycemic events</b>       |                             |                       |                        |            |
| Glucose > 180 mg/dL               | 58 (100.0)                  | 6.31 (26.3)           | 59 (95.2)              | 37.5 (0.5) |
| Glucose > 250 mg/dL               | 56 (96.6)                   | 1.56 (6.5)            | 47 (75.8)              | 5.84 (0.1) |
| <b>Hypoglycemic events</b>        |                             |                       |                        |            |
| Glucose < 70 mg/dL                | 56 (96.6)                   | 0.62 (2.6)            | 15 (24.2)              | 0.34 (0.0) |
| Glucose < 54 mg/dL                | 45 (77.6)                   | 0.09 (0.4)            | 6 (9.7)                | 0.16 (0.0) |

Data are shown as number (percentage). Glucose monitoring per day is the average number of active CGM scan for the intervention group and the total number of BGM divided by 84 days for the control group. Number and percentage of participants with any detected hyperglycemic or hypoglycemic events during the study period are listed for both groups. For the intervention group, average duration of time spent in hyperglycemia and hypoglycemia are presented in hours and percentage of the day. For the control group, average number of blood glucose monitoring (BGM) during the study period for hyperglycemia and hypoglycemia are listed. Average percentage of hyperglycemia and hypoglycemia per day have been calculated by dividing the number of BGM by 84 days (study period). BGM is based on the data from the glucose logbook.
