# Supplementary material
Source: publisher figshare collection journal article supplement (https://diabetesjournals.figshare.com/articles/dataset/_/20382915)
Supplement: Supplementary file 3 [file 1]

### Supplementary Material 3

Supplement to:

“Effects of Patient-Driven Lifestyle Modification Using Intermittently Scanned Continuous Glucose Monitoring in Patients with Type 2 Diabetes: Results from the Randomized Open-label PDF Study”

| <b>Supplementary Figure</b>                                                                                             | <b>Page</b> |
|-------------------------------------------------------------------------------------------------------------------------|-------------|
| <i>Figure S1. Subgroup analysis of participants reaching HbA1c &lt; 7.0% at V2</i>                                      | 2           |
| <i>Figure S2. Subgroup analysis of participants with <math>\Delta</math>HbA1c <math>\geq</math> 0.5% at V2</i>          | 3           |
| <i>Figure S3. SDSCA-K scores in study participants</i>                                                                  | 4           |
| <i>Figure S4. Ambulatory glucose profile in the intervention group</i>                                                  | 6           |
| <i>Figure S5. Biweekly CGM outcomes in the intervention group</i>                                                       | 7           |
| <i>Figure S6. Correlation between CGM utility and glycemic outcomes</i>                                                 | 8           |
| <i>Figure S7. Glycemic outcome by basal insulin usage in the intervention group</i>                                     | 9           |
| <i>Figure S8. Consort diagram in per protocol analysis</i>                                                              | 10          |
| <i>Figure S9. Biweekly CGM outcomes in the intervention group with percent active time on CGM <math>\geq</math> 80%</i> | 11          |

**Supplementary Figure 1. Subgroup analysis of participants reaching HbA1c < 7.0% at V2**

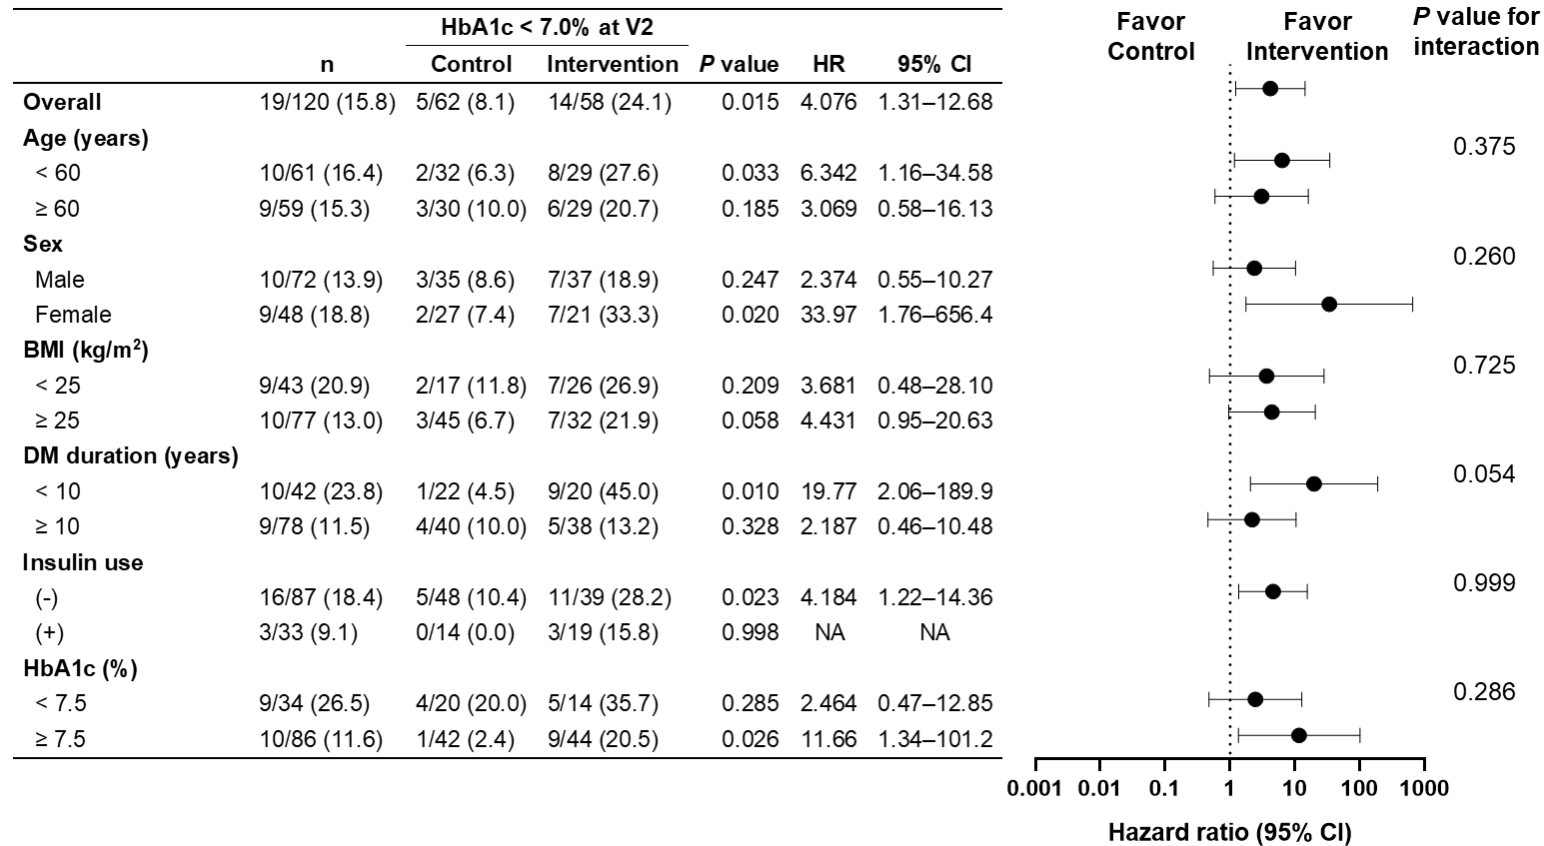

Cox regression and subgroup analyses of the glycemic target achievement of HbA1c < 7.0% at V2. On the right side is the forest plot for patient subgroups with respect to the target glycemic achievements. *P* values describe the interaction between the target glycemic achievement and subgroup variables with no adjustment for multiple testing. HR, hazard ratio; BMI, body mass index; DM, diabetes mellitus

**Supplementary Figure 2. Subgroup analysis of participants with  $\Delta\text{HbA1c} \geq 0.5\%$  at V2**

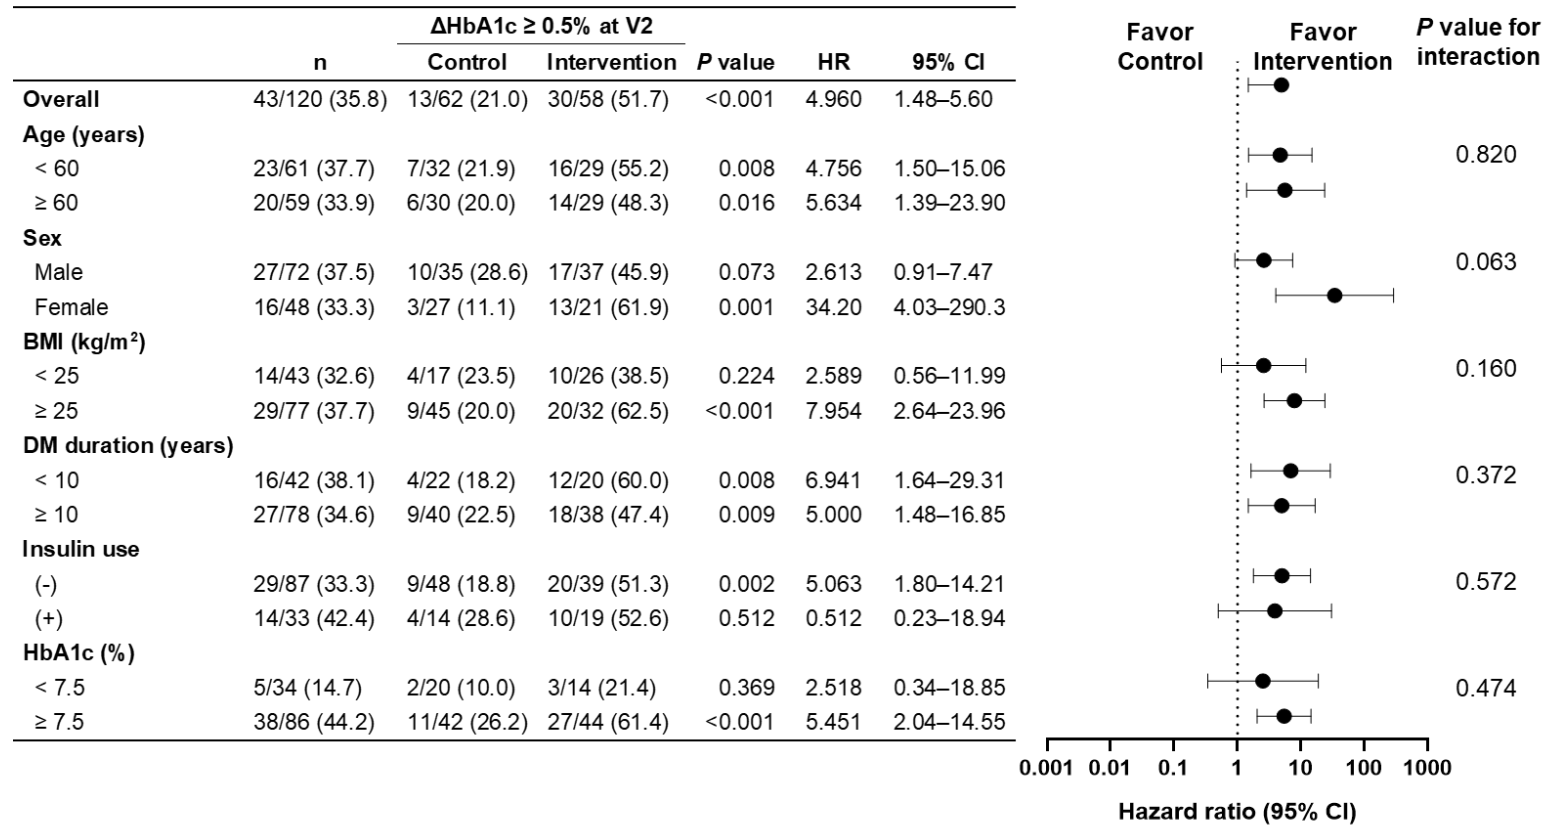

Cox regression and subgroup analyses of the glycemic target achievement of  $\Delta\text{HbA1c} > 0.5\%$  at V2. On the right side is the forest plot for patient subgroups with respect to the target glycemic achievements. *P* values describe the interaction between the target glycemic achievement and subgroup variables with no adjustment for multiple testing. HR, hazard ratio; BMI, body mass index; DM, diabetes mellitus

**Supplementary Figure 3. SDSCA-K scores in study participants**

**A**

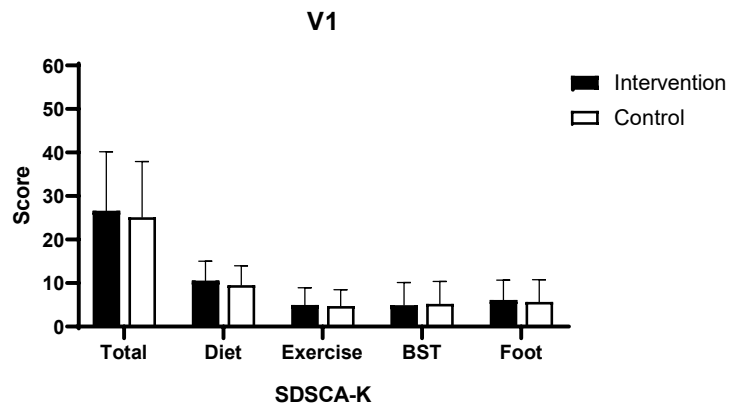

**B**

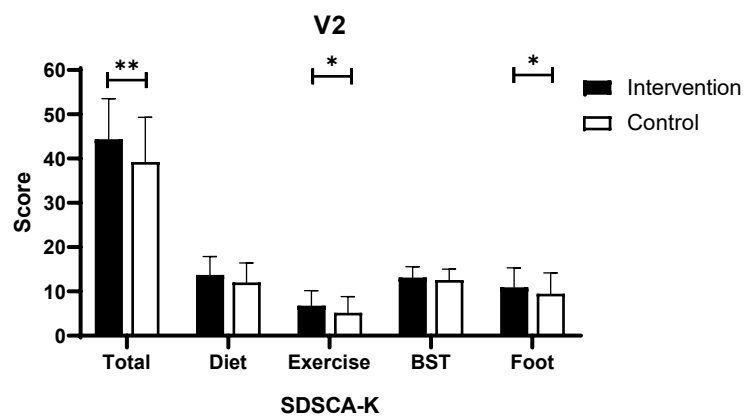

**C**

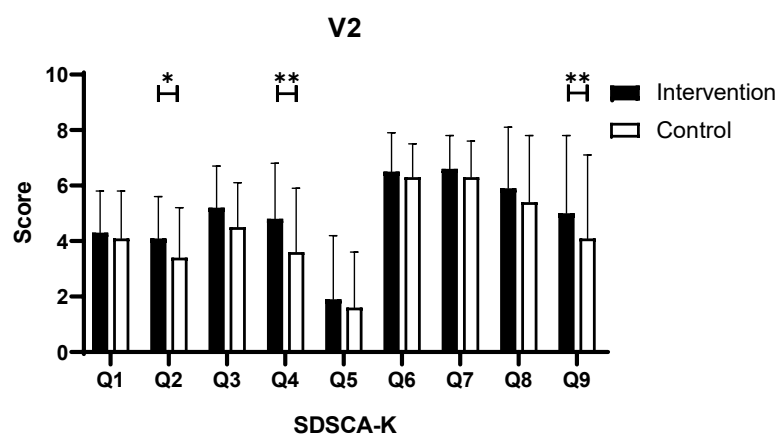

Change of Korean Version of Revised Summary of Diabetes Self-Care Activities Questionnaire (SDSCA-K) scores in study participants from V1 to V2 by study group. *A*: comparison of SDSCA-K total scores, and in sections of diet, exercise, blood sugar testing (BST), and foot care at V1 in intervention group and control group. *B*: comparison of SDSCA-K total scores, and in sections of diet, exercise, blood sugar testing (BST), and foot care at V2 in intervention group and control group. *C*: Comparison of specific items in the SDSCA-K questionnaire by study group at V2. Items for Diet: Q1–Q3, Exercise: Q4–Q5, BST: Q6–Q7, Foot care: Q8–Q9. The data were analyzed by ranked ANCOVA and expressed as mean  $\pm$  standard deviation. \* $P < 0.05$ , \*\* $P < 0.01$ .

**Supplementary Figure 4. Ambulatory glucose profile in the intervention group**

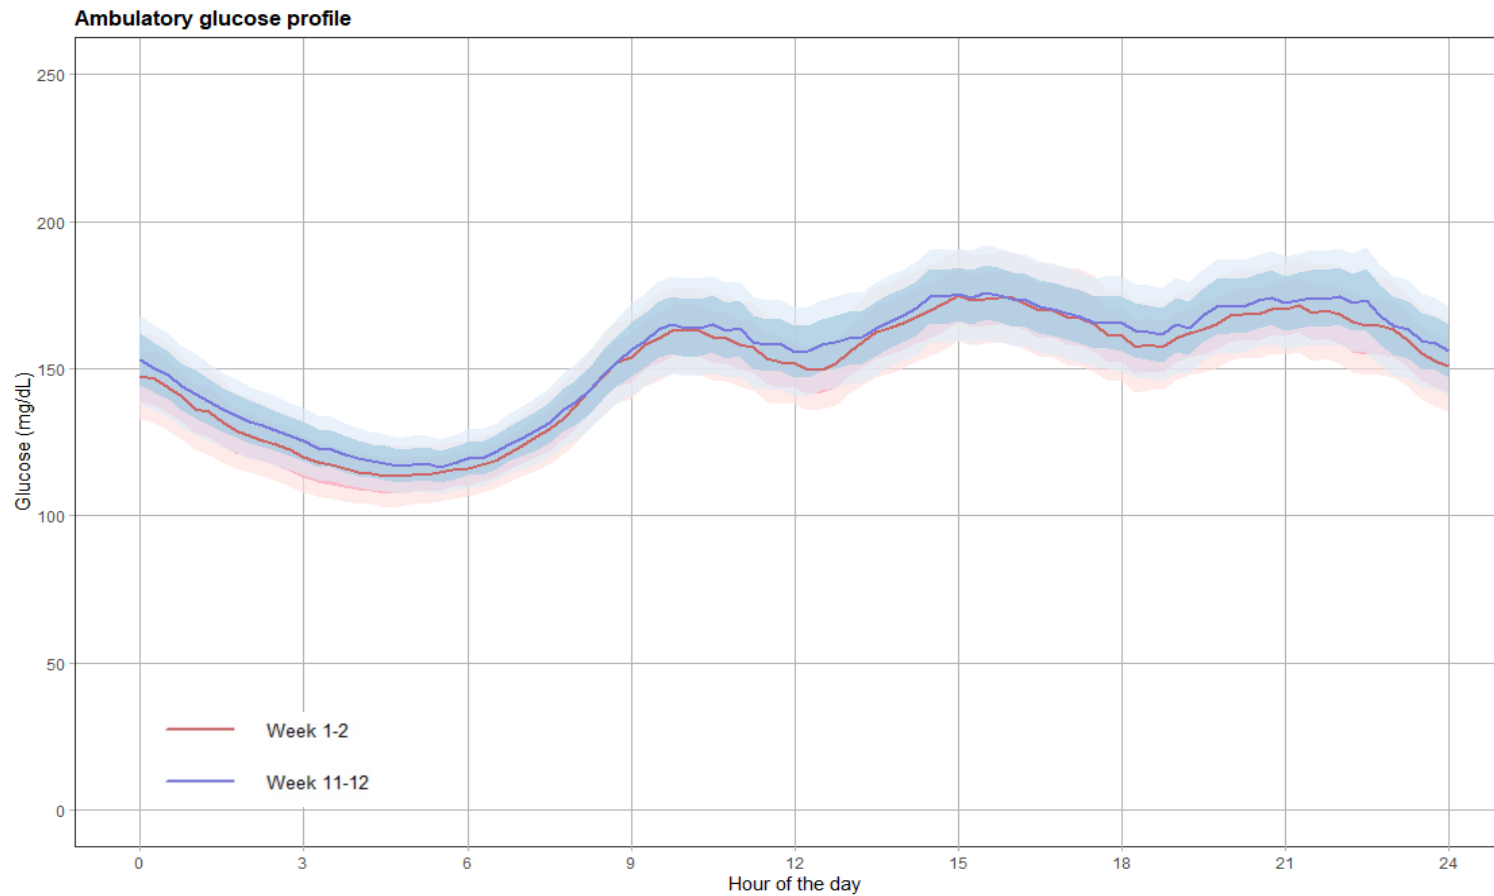

A plot of mean glucose of the intervention group, measured with CGM during the first and the last 14 days of the study period (n=58). Red line denotes the mean glucose of the first 14 days. Dark pink regions represent 50% of the glucose values (75% CI) and light pink regions represent the 95% CI. Blue line denotes the mean glucose of the last 14 days. Dark blue regions represent 50% of the glucose values (75% CI) and light blue regions represent the 95% CI.

**Supplementary Figure 5. Biweekly CGM outcomes in the intervention group**

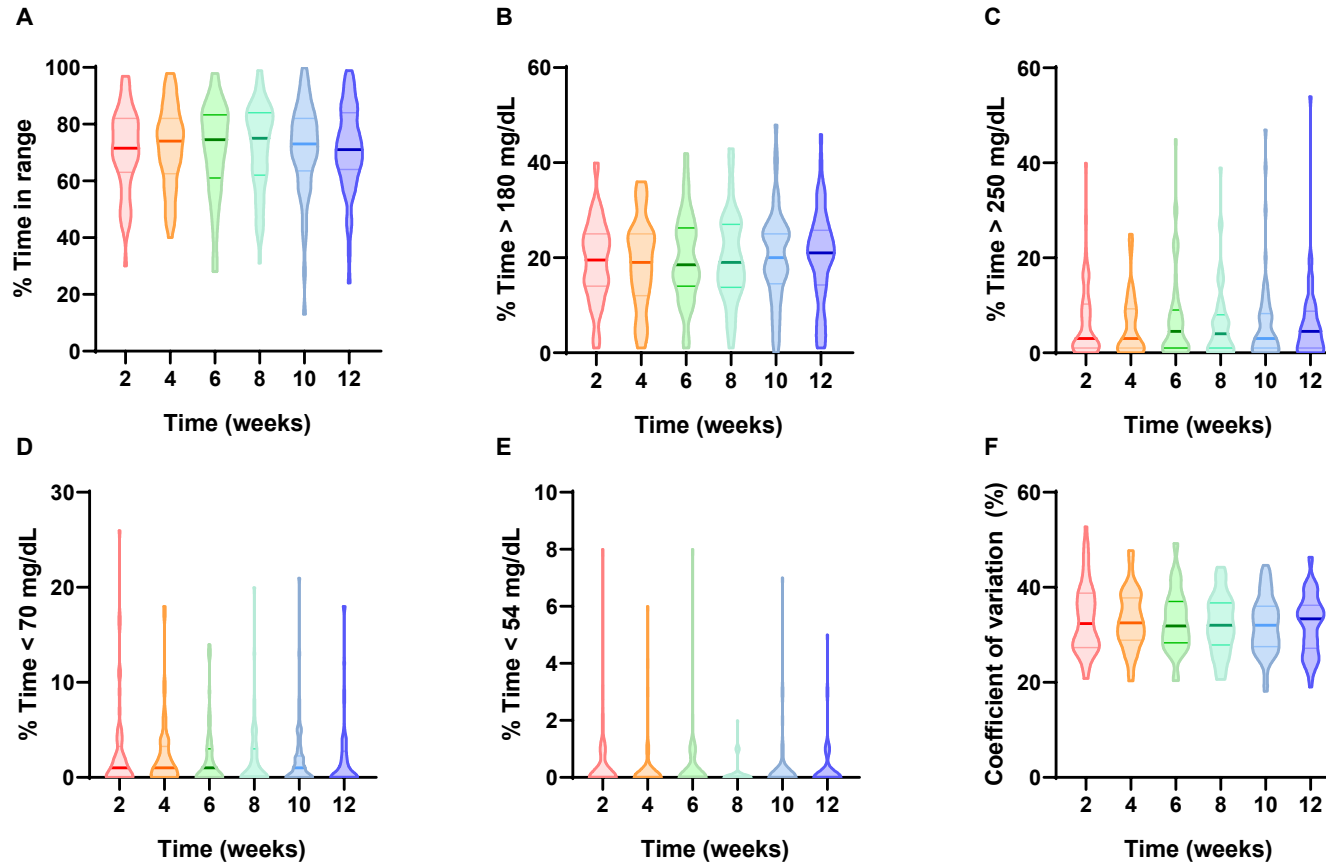

Violin plot of CGM metrics in the intervention group. *A*: % Time in range, *B*: % Time > 180 mg/dL, *C*: % Time > 250 mg/dL, *D*: % Time < 70 mg/dL, *E*: % Time < 54 mg/dL, *F*: Coefficient of variation (%). Red, orange, green, light blue, blue, and purple regions represent the CGM during weeks 1–2, 3–4, 5–6, 7–8, 9–10, 11–12, respectively.

**Supplementary Figure 6. Correlation between CGM utility and glycemic outcomes**

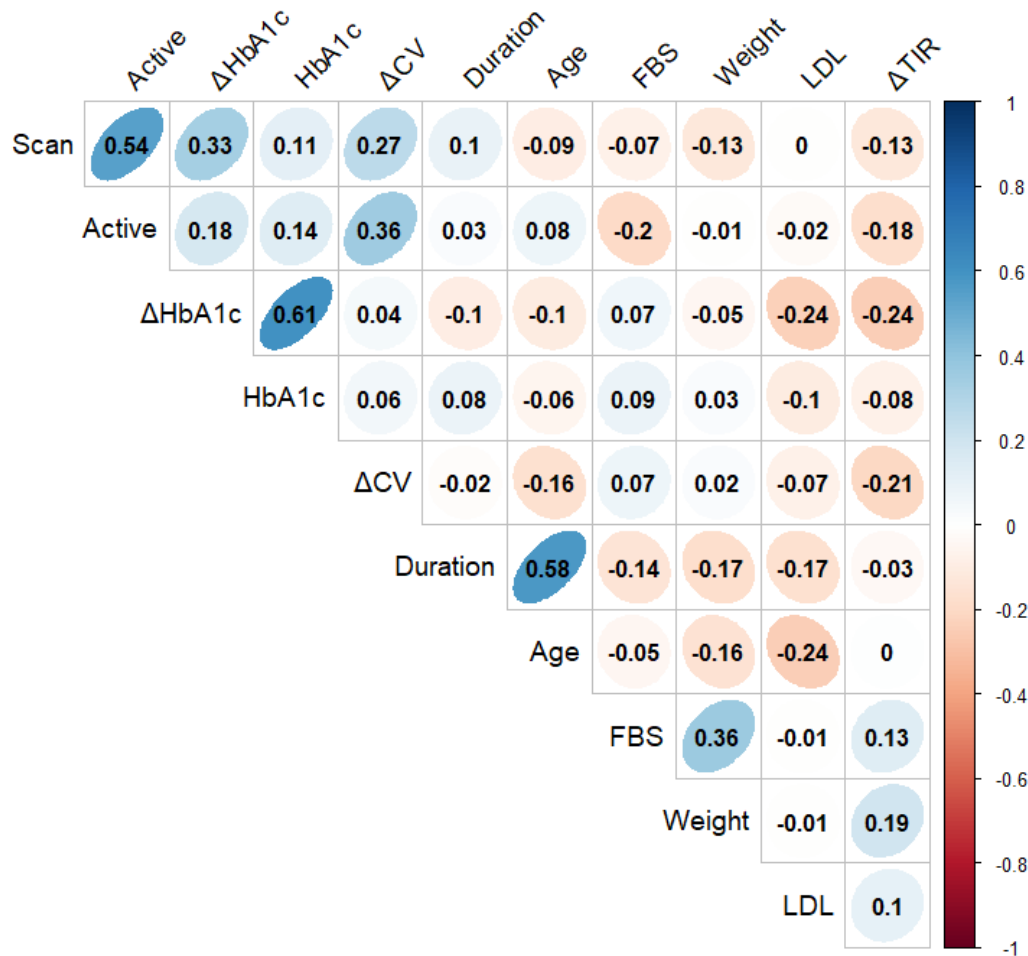

A correlation plot of various CGM measures, glycemic outcomes with baseline characteristics of participants in the intervention group. Reduction of HbA1c values from baseline was strongly associated with higher baseline HbA1c ( $\gamma$ , 0.610; 95% CI, 0.417–0.750;  $P < 0.001$ ) and frequency of CGM scan ( $\gamma$ , 0.333; 95% CI, 0.082–0.545;  $P = 0.011$ ), but not to percent CGM active time ( $\gamma$ , 0.177; 95% CI, -0.085–0.416;  $P = 0.184$ ). Reduction of HbA1c was numerically associated with increase in % time in range ( $\gamma$ , -0.242; 95% CI, -0.471 – 0.018;  $P = 0.068$ ) Reduction of coefficient of variation from baseline was associated with both frequency of CGM scan ( $\gamma$ , 0.268; 95% CI, 0.010–0.492;  $P = 0.042$ ) and percent CGM active time ( $\gamma$ , 0.359; 95% CI, -0.111–0.565;  $P = 0.006$ ). Positive correlations are displayed in blue and negative correlations in red color. Color intensity and the eccentricity of ellipses are proportional to the correlation coefficients.  $\Delta$  values are indicative of V1 – V2 values. CV, coefficient of variation; LDL, low density lipoprotein cholesterol; FBS, fasting blood glucose; TIR, time in range; Duration indicates time of duration since the diagnosis of diabetes mellitus.



# **Supplementary Figure 7. Glycemic outcome by basal insulin usage in the intervention group**

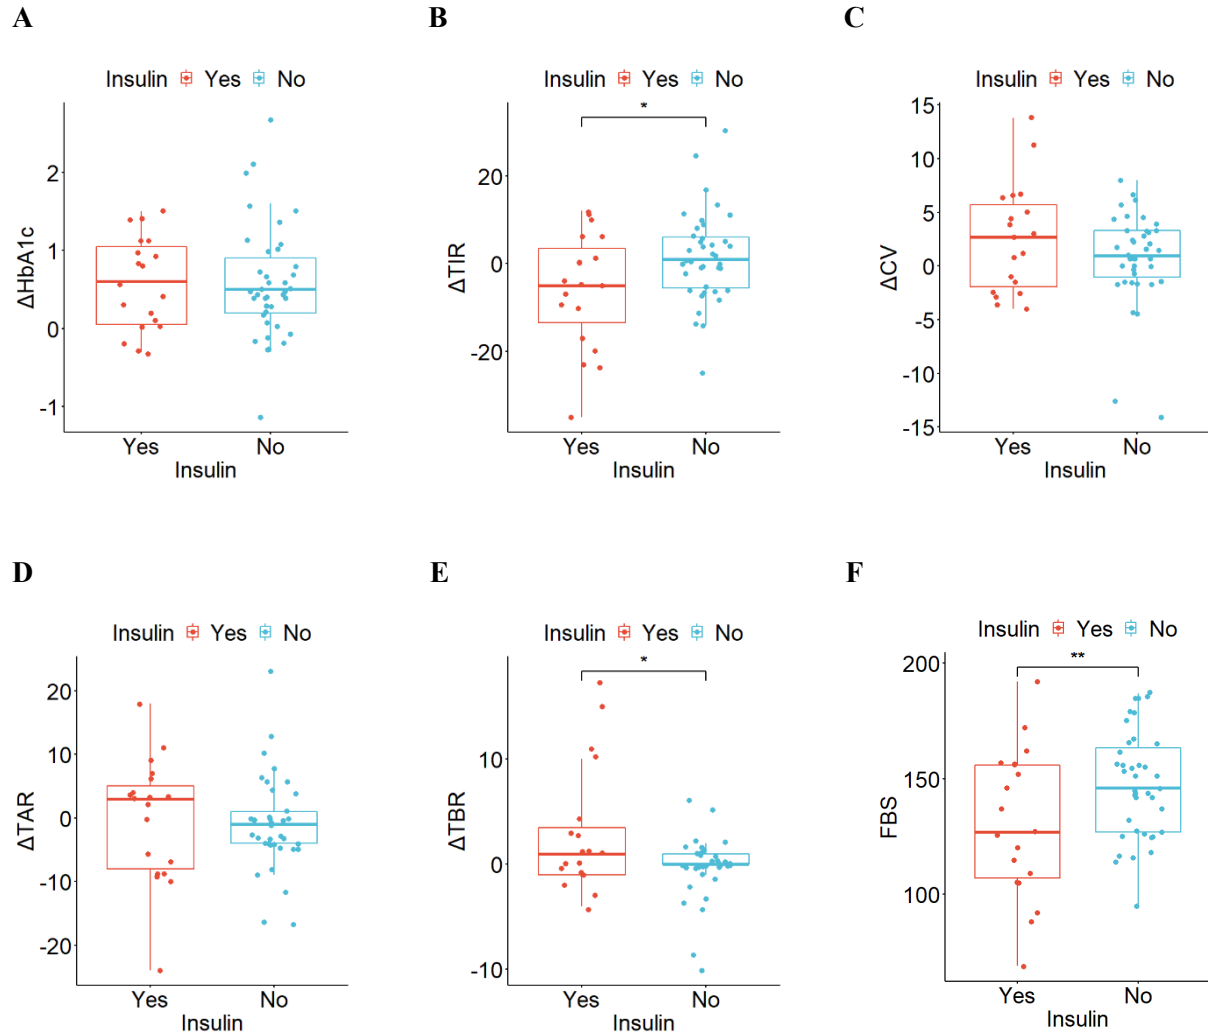

Boxplots comparing the effect of various CGM outcome measures by the use of basal insulin in the intervention group.  $\Delta$  values are indicative of  $V1 - V2$  values. *A*: Change of HbA1c from the baseline according to the use of basal insulin ( $P = 0.916$ ). *B*: Change of time in range from baseline according to the use of basal insulin ( $P = 0.022$ ). *C*: Change of coefficient of variation from baseline according to the use of basal insulin ( $P = 0.196$ ). *D*: Change of time below range ( $< 70$  mg/dL) from baseline according to the use of basal insulin ( $P = 0.046$ ). *E*: Change of time above range ( $> 180$  mg/dL) from baseline according to the use of basal insulin ( $P = 0.771$ ). *F*: Mean glucose at V2 according to the use of basal insulin ( $P = 0.004$ ). Red color indicates insulin users and blue color indicates non-insulin users. \* $P < 0.05$ , \*\* $P < 0.01$ .

**Supplementary Figure 8. Consort diagram in per protocol analysis**

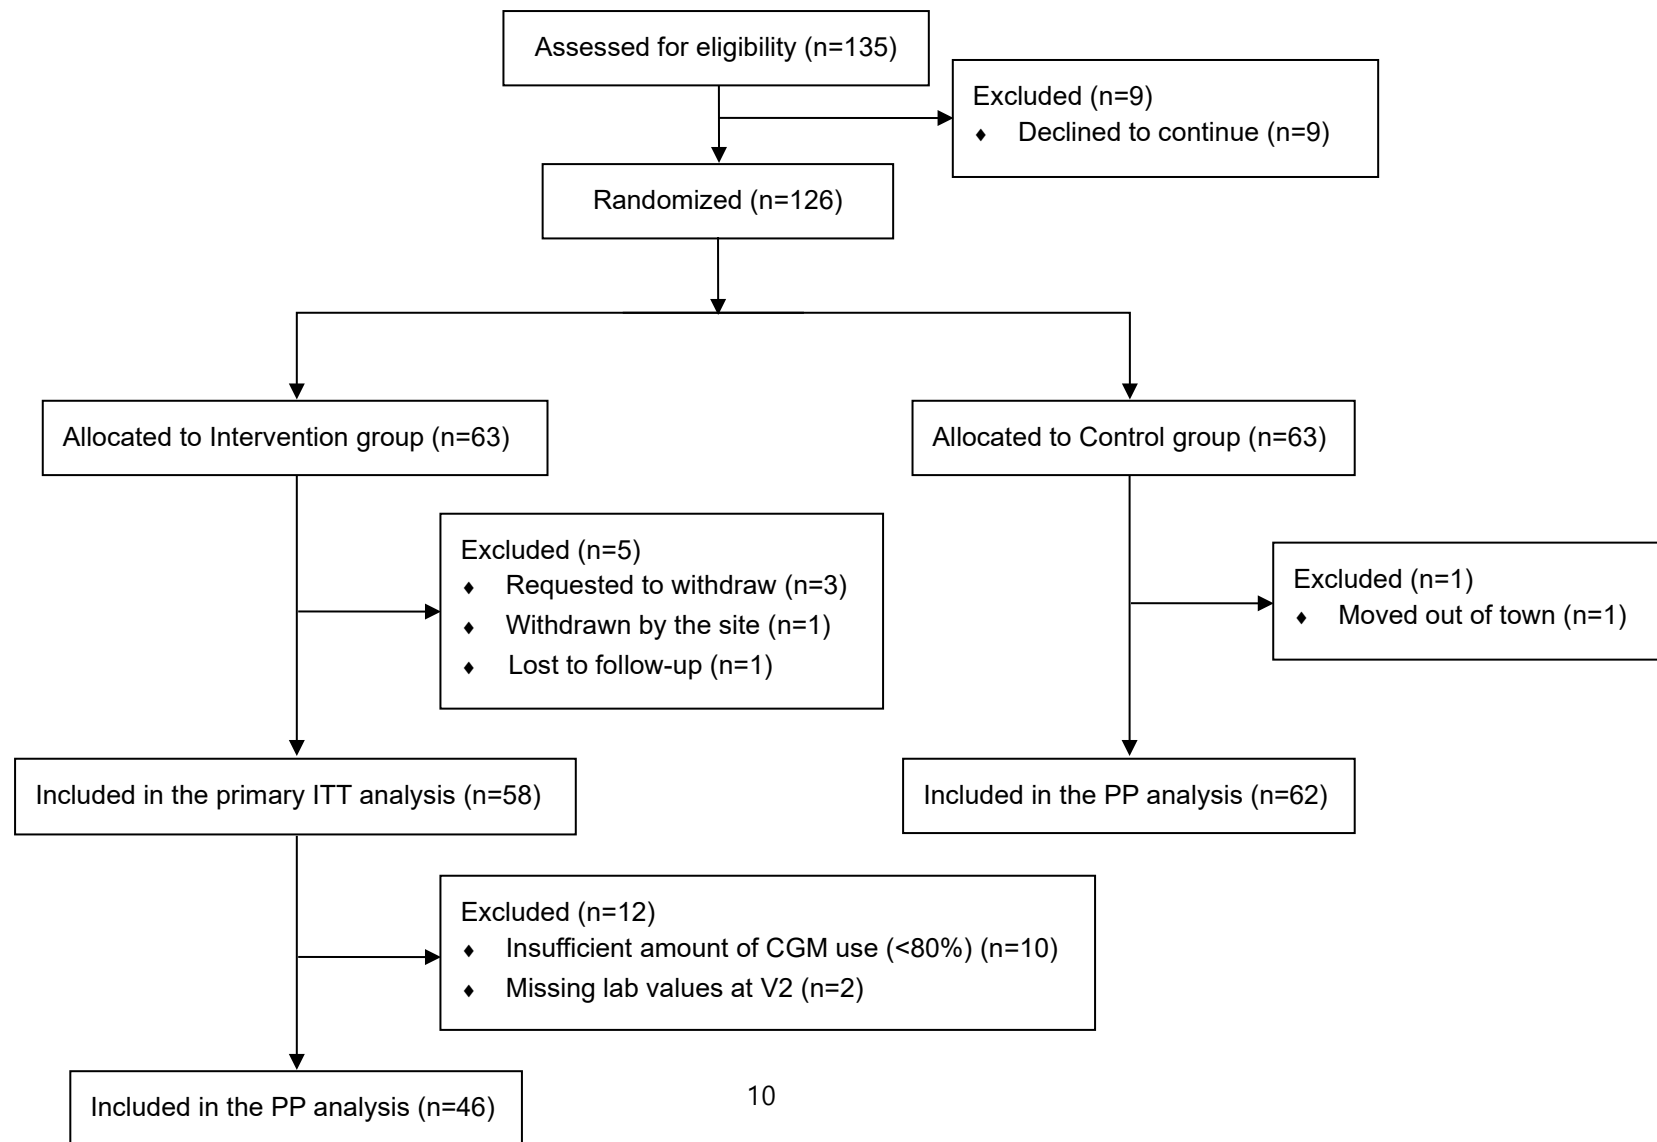

**Supplementary Figure 9. Biweekly CGM outcomes in the intervention group with percent active time on CGM  $\geq 80\%$**

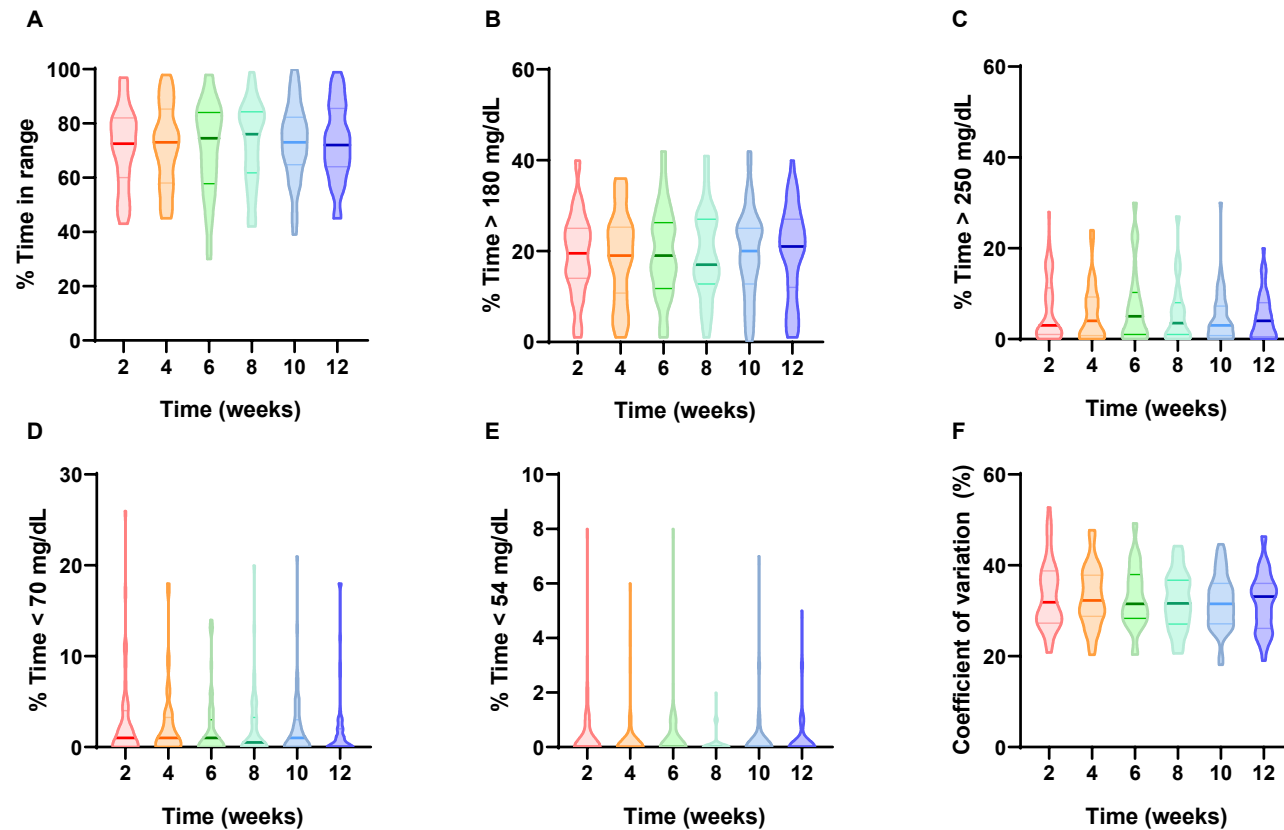

Violin plot of CGM metrics in the intervention group. *A*: % Time in range, *B*: % Time > 180 mg/dL, *C*: % Time > 250 mg/dL, *D*: % Time < 70 mg/dL, *E*: % Time < 54 mg/dL, *F*: Coefficient of variation (%). ( %). Red, orange, green, light blue, blue, and purple regions represent the CGM during weeks 1–2, 3–4, 5–6, 7–8, 9–10, 11–12, respectively
